# Supplementary material
Source: PubMed Central journal article supplement (PMC9523400)
Supplement: mmc1.pdf [file mmc1.pdf]

iScience, Volume 25

## **Supplemental information**

### **SARS-CoV-2 infection of human pluripotent stem cell-derived liver organoids reveals potential mechanisms of liver pathology**

**Alexsia Richards, Max Friesen, Andrew Khalil, M. Inmaculada Barrasa, Lee Gehrke, and Rudolf Jaenisch**

(A)

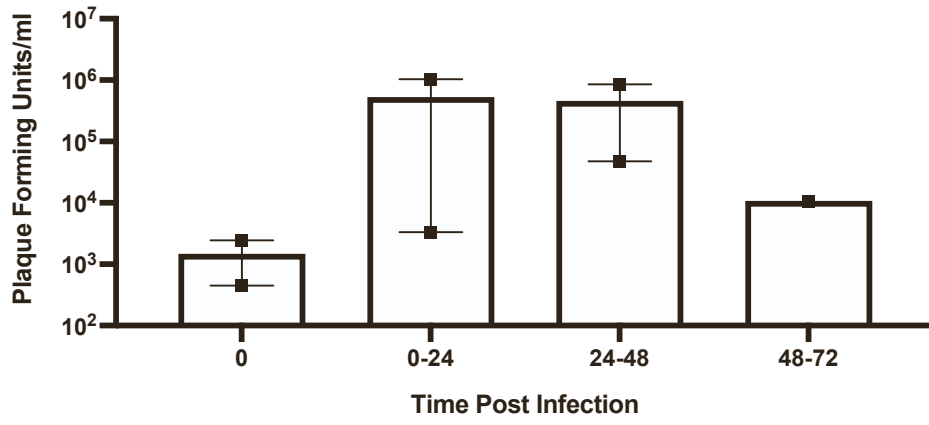

(B)

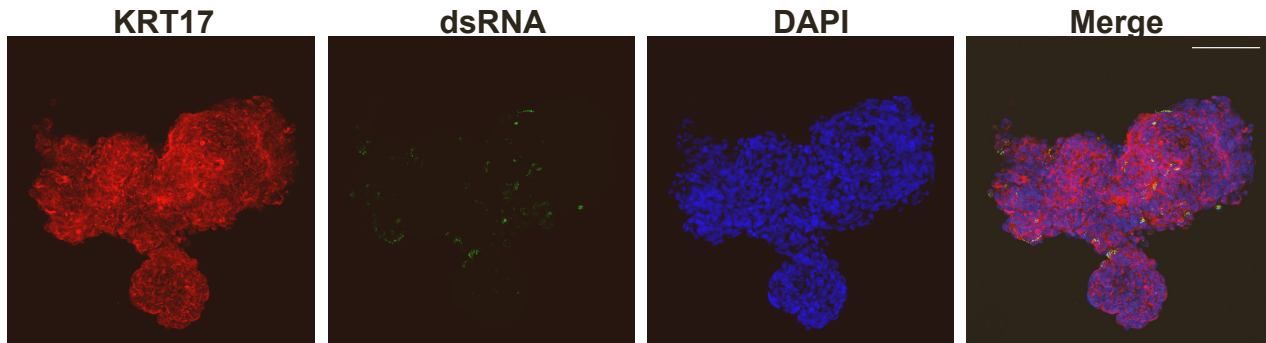

**SERPINA1**

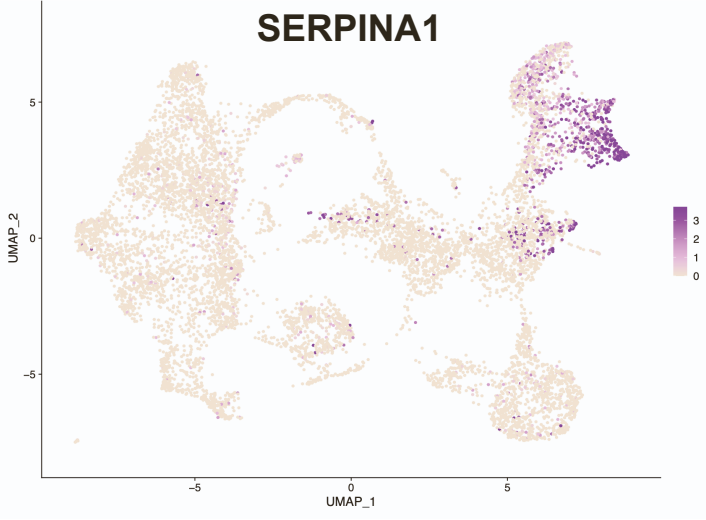

**CYP3A4**

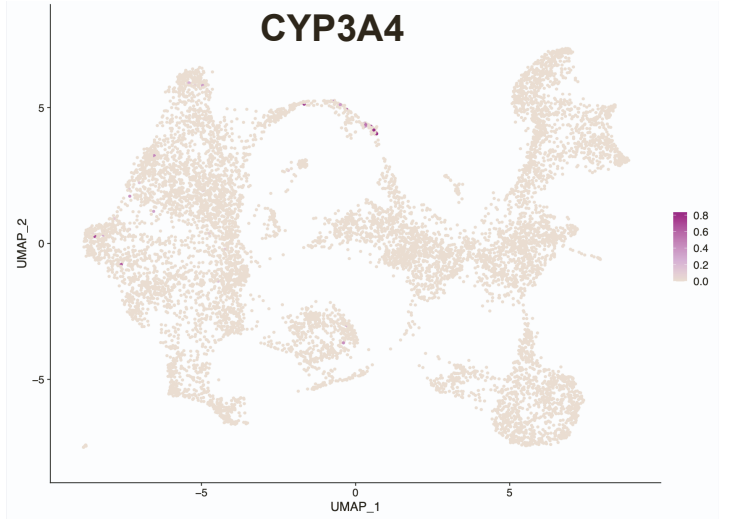

**ALB**

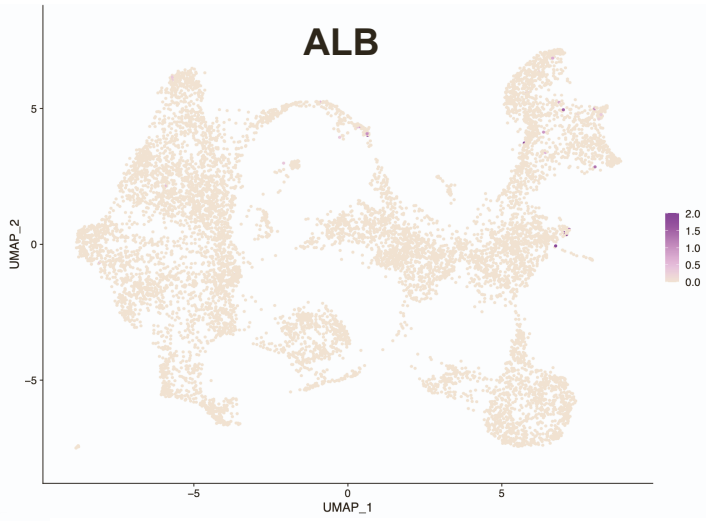

**TF**

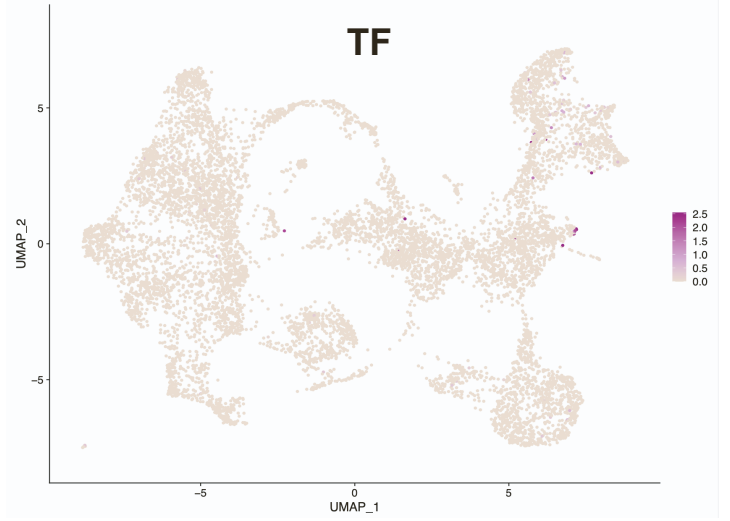

**ASGR1**

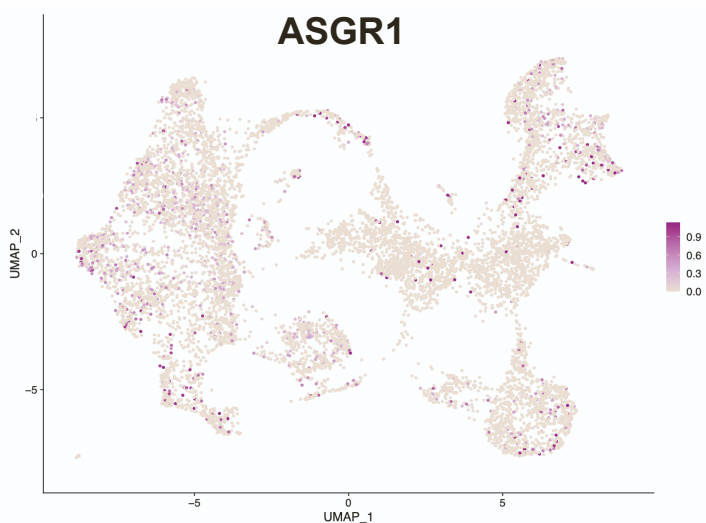

**TTR**

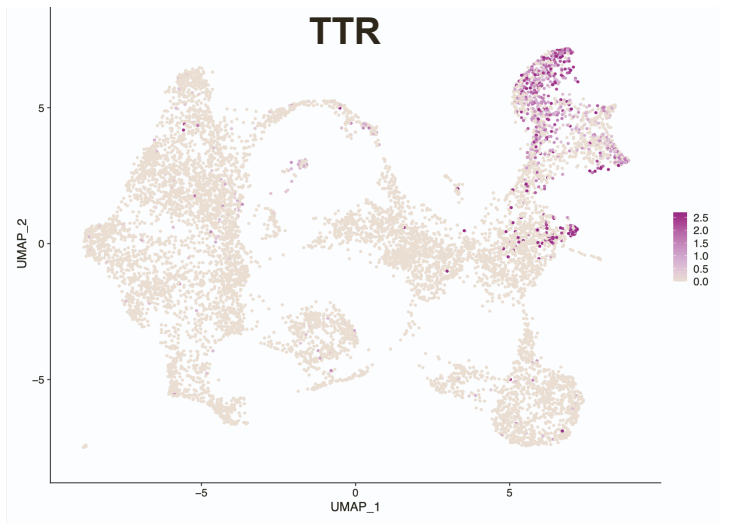

(A)

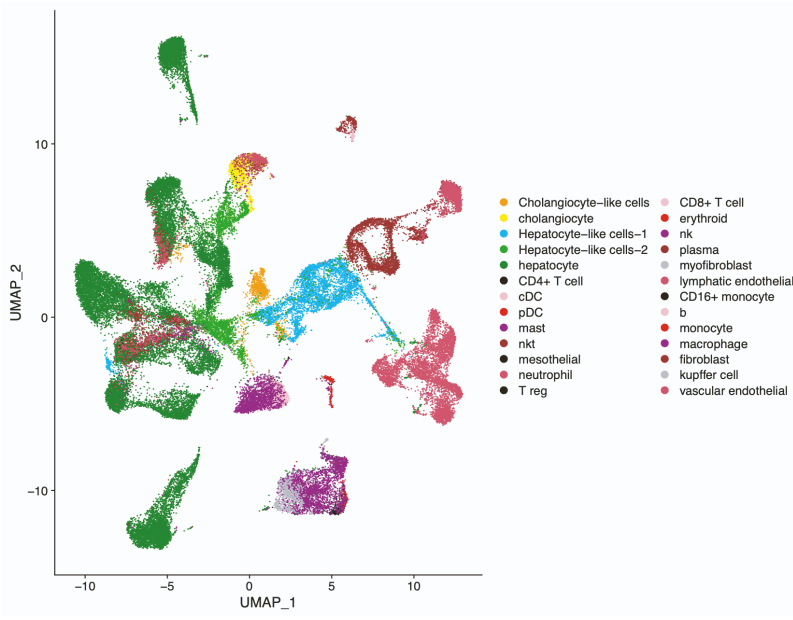

(B)

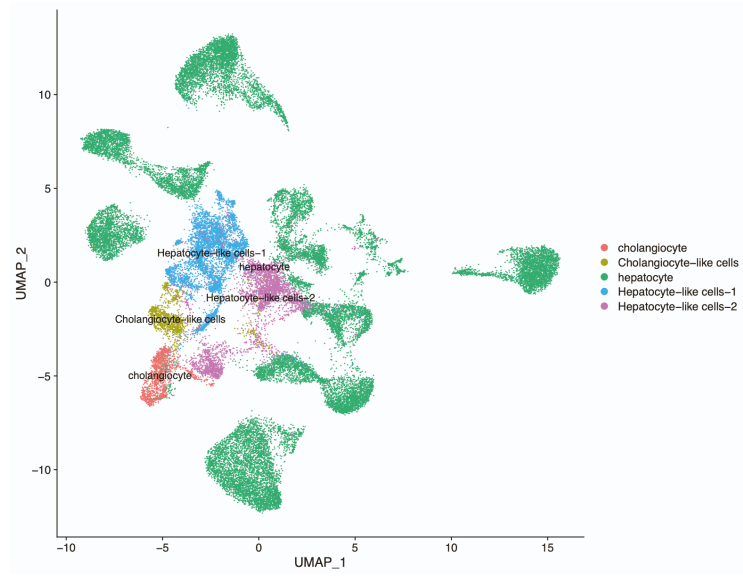

(C)

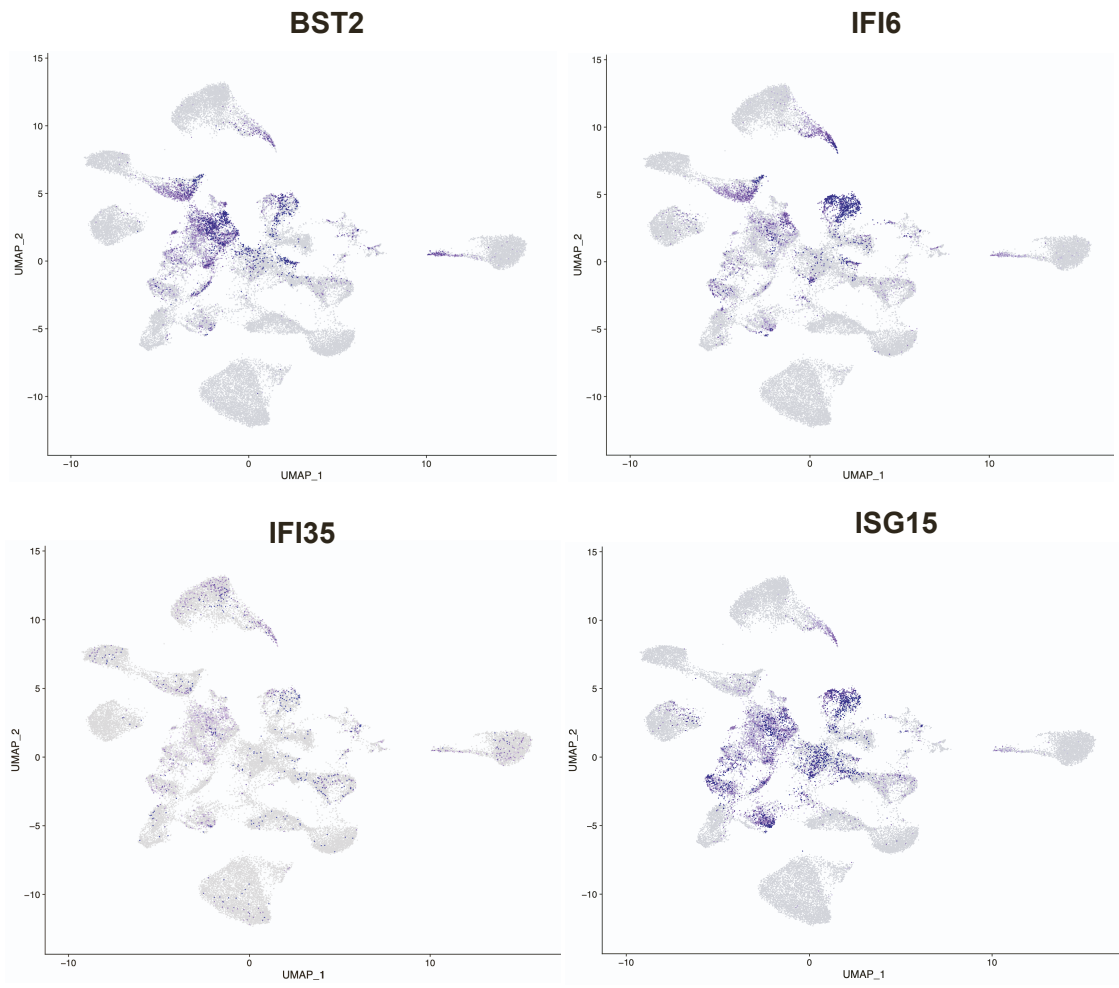

(A)

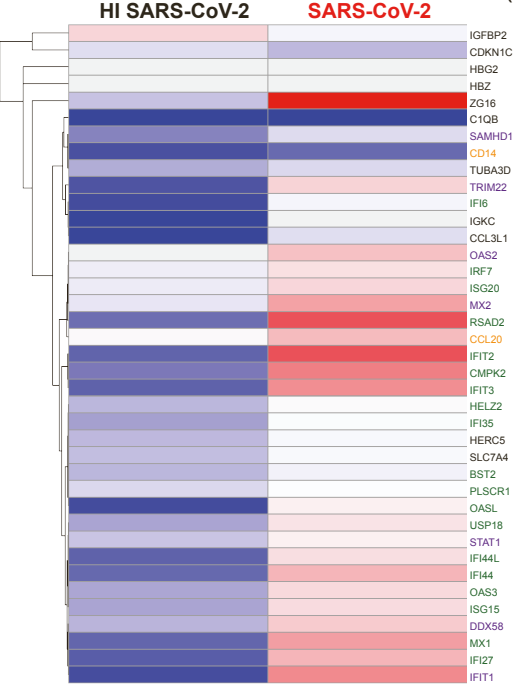

(B)

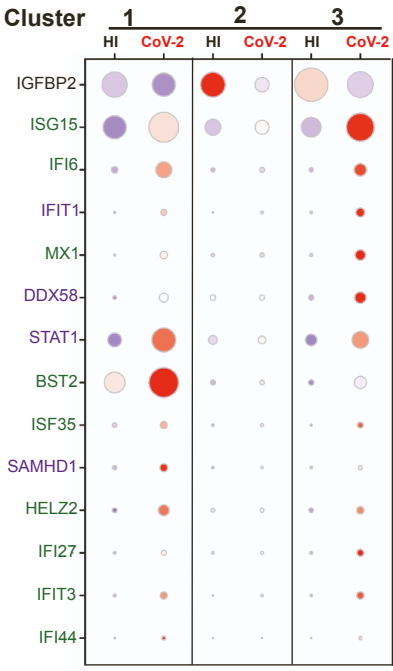

(C)

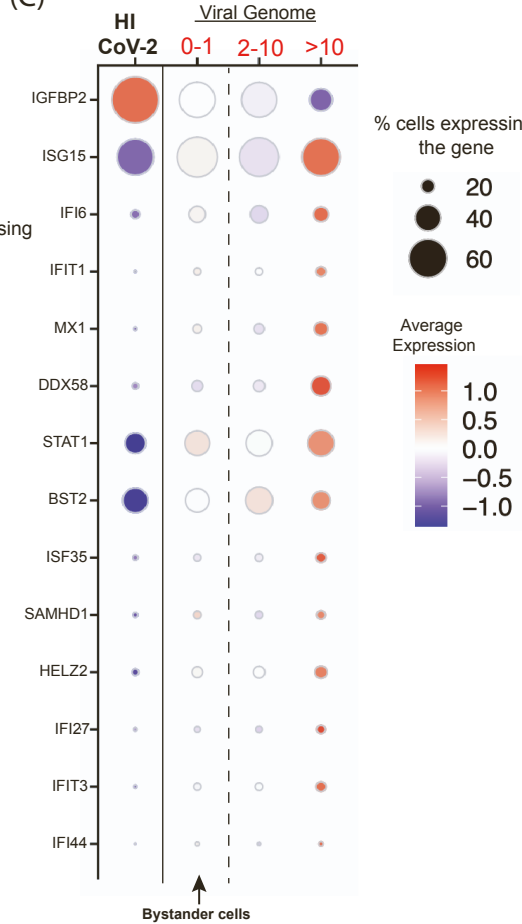

**ESC #1**

Virus added: HI Sars-CoV-2 Sars-CoV-2

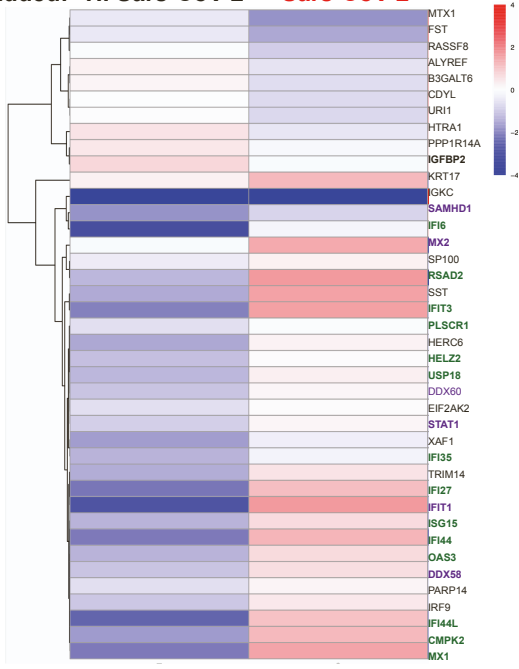

**iPSC #1**

Virus added: HI Sars-CoV-2 Sars-CoV-2

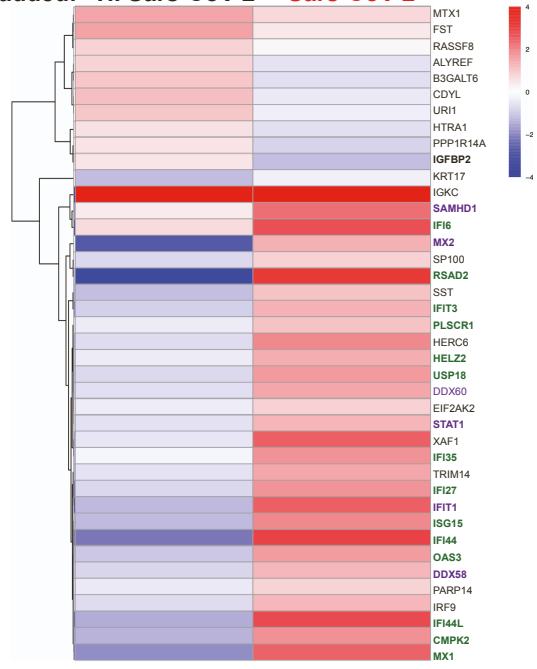

(A)

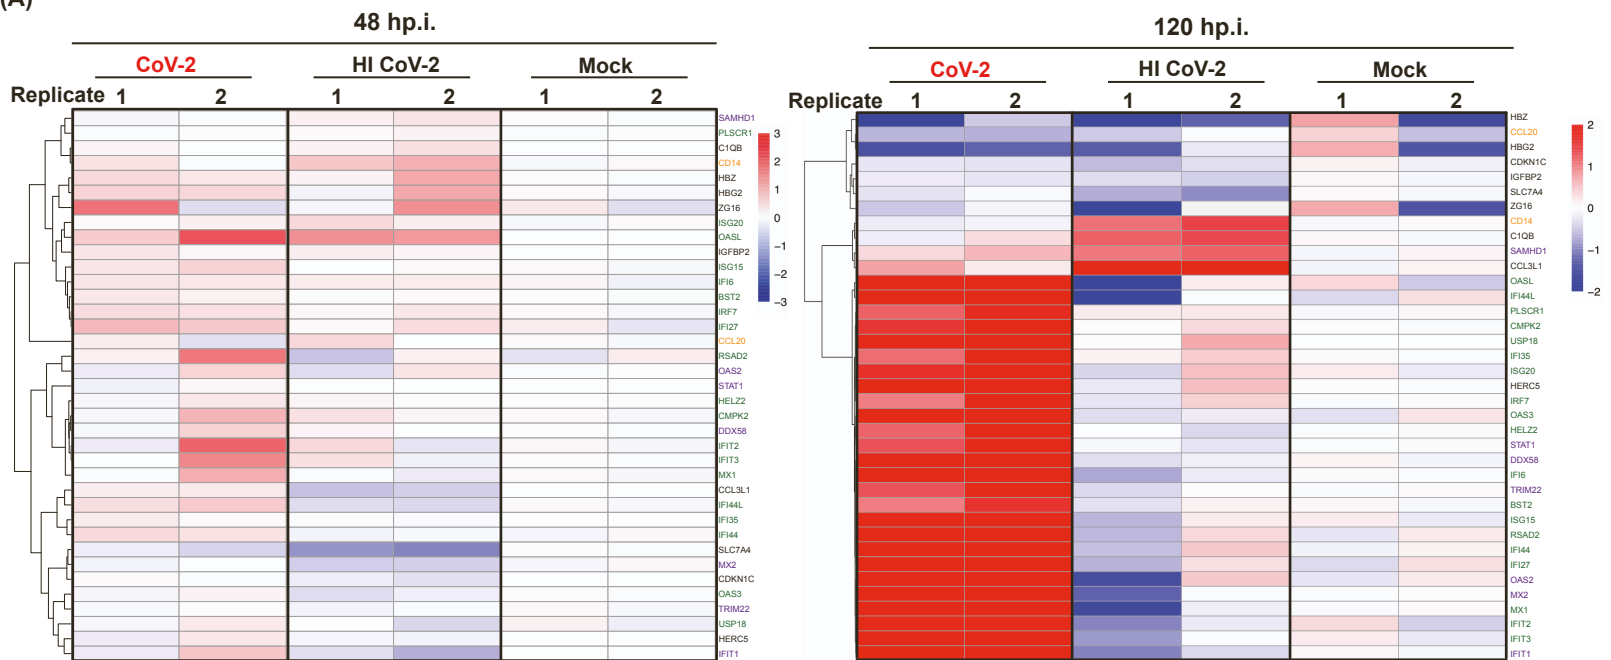

(B)

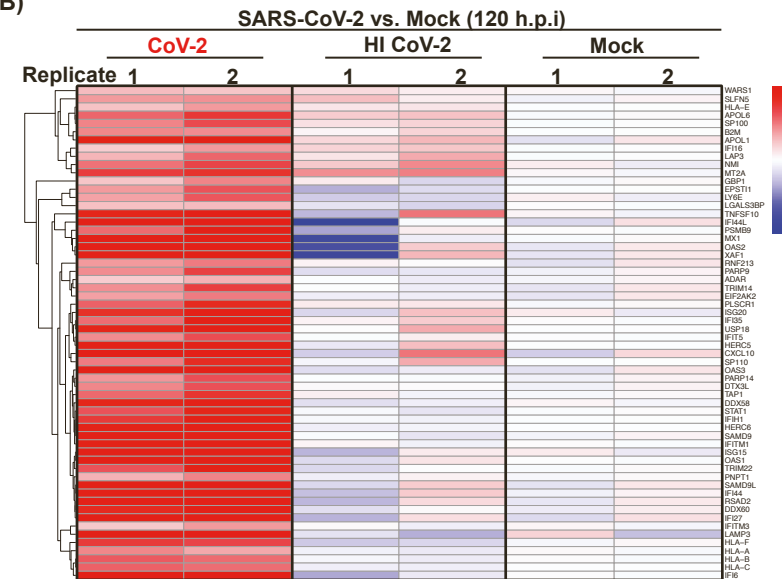

(C)

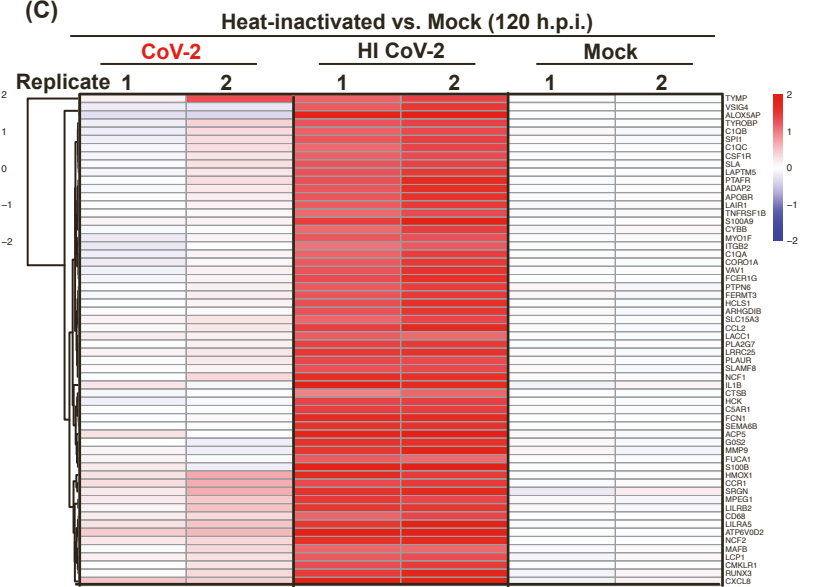

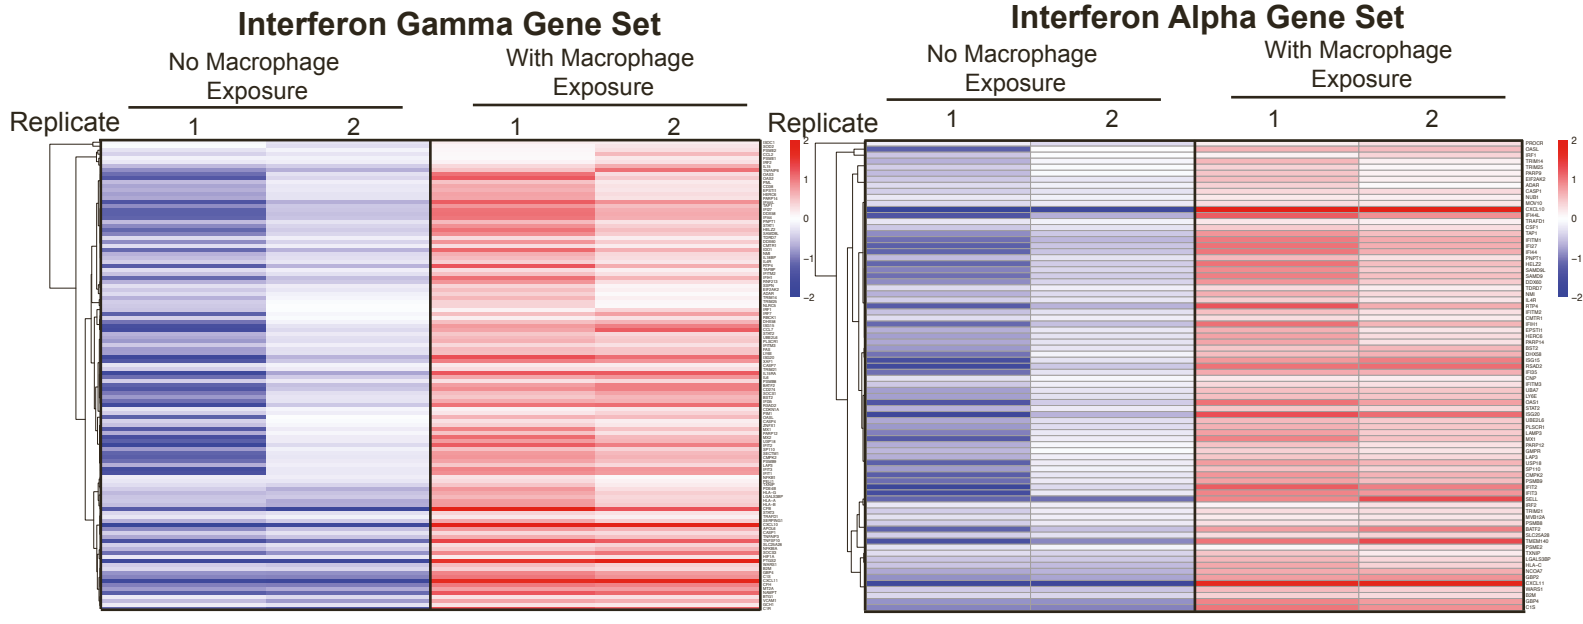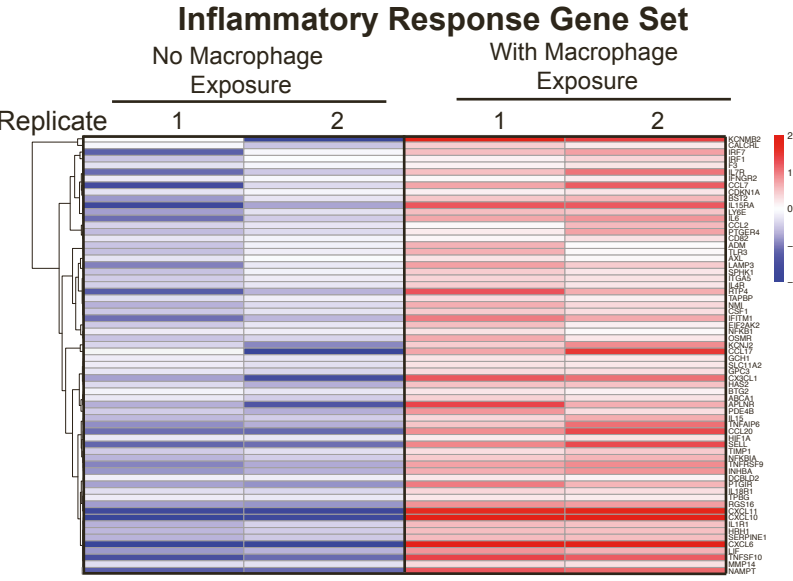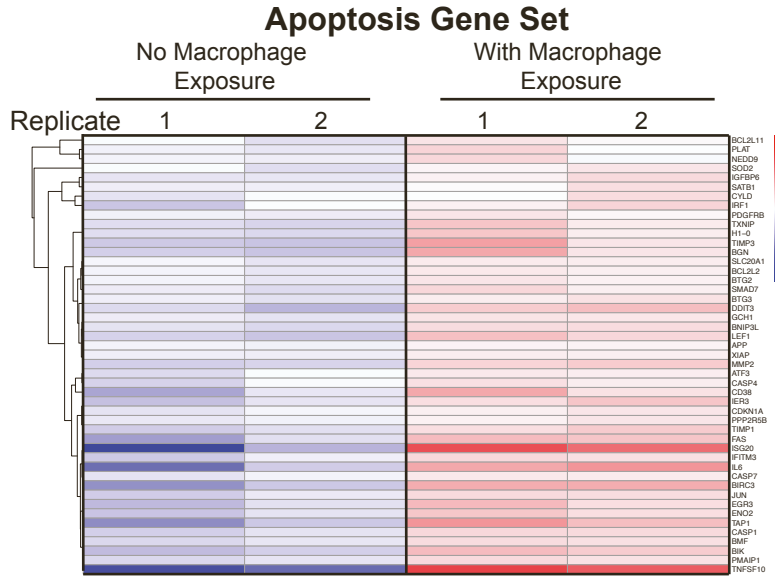



(A)

**SARS-CoV-2 infected  
(macrophage + Tocilizumab / macrophage)**

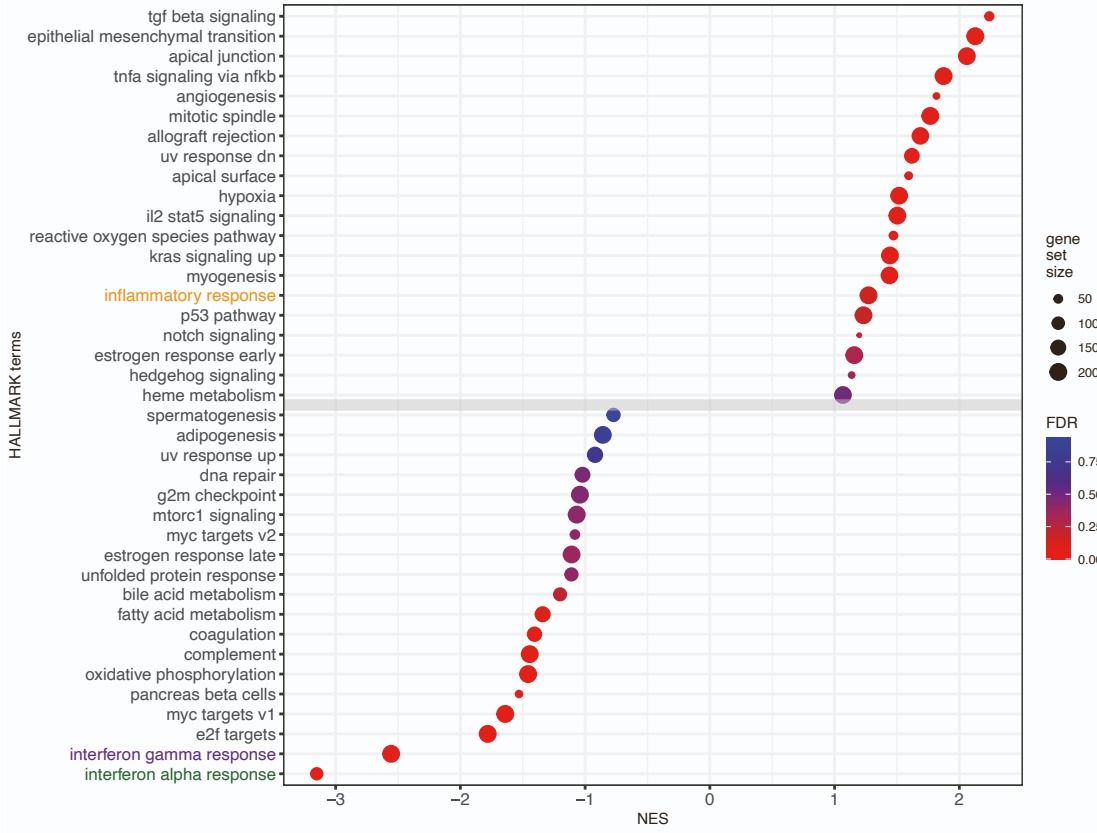

**Interferon Alpha Gene Set**

**Interferon Gamma Gene Set**

(B) No Macrophage Exposure    With Macrophage Exposure    With Macrophage Exposure + Tocilizumab

No Macrophage Exposure    With Macrophage Exposure    With Macrophage Exposure + Tocilizumab

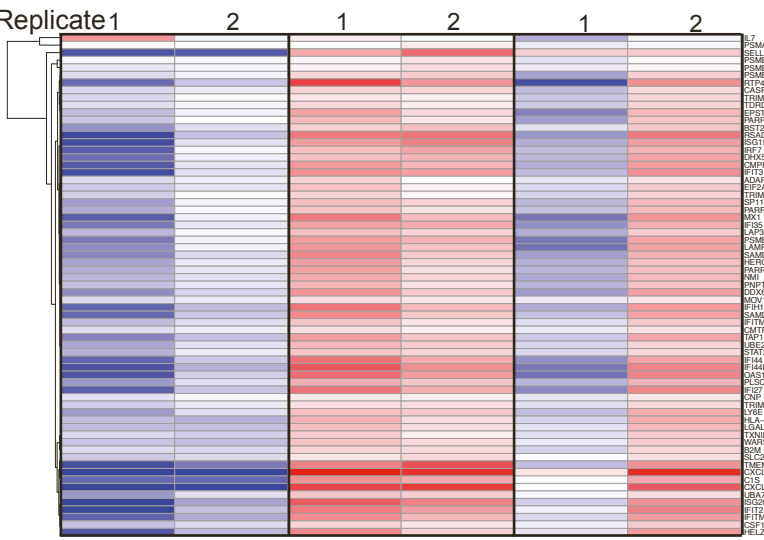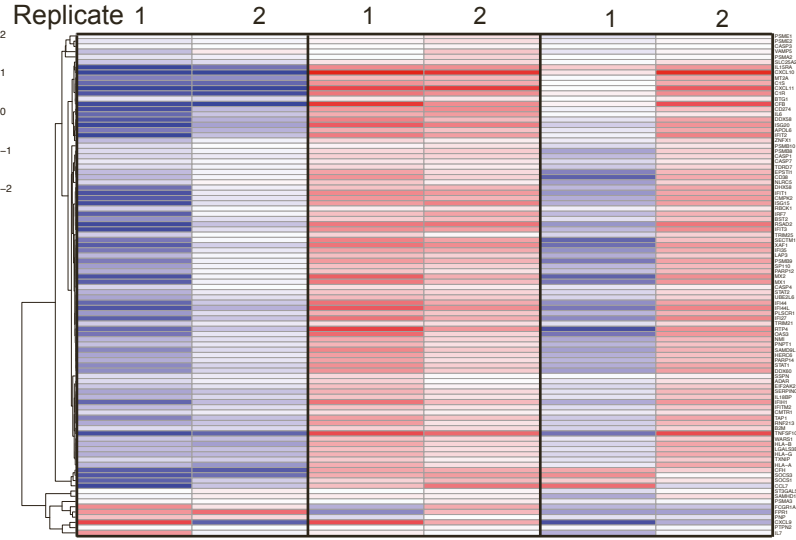

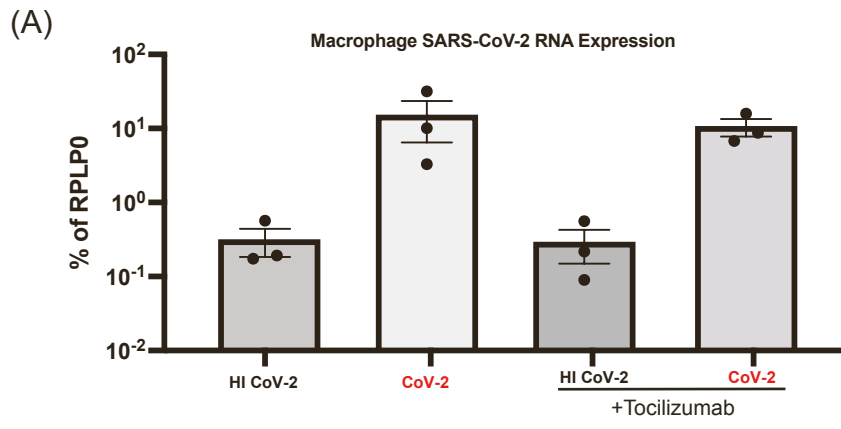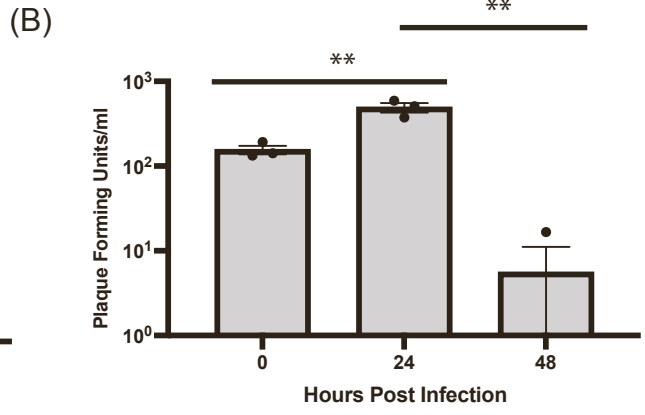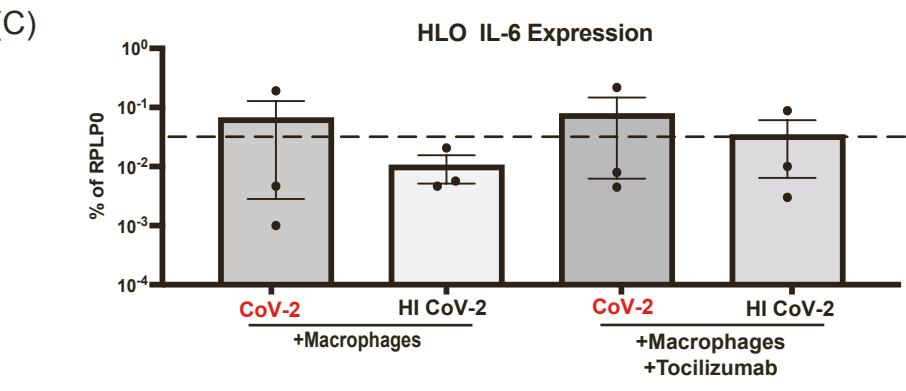

**Table S1:** Cell counts of populations identified based on reads mapped to the SARS-CoV-2 genome

| Cell Line | Virus         | Reads mapped to the SARS-CoV-2 genome |      |     |
|-----------|---------------|---------------------------------------|------|-----|
|           |               | 0-1                                   | 2-10 | >10 |
| H1        | SARS-CoV-2    | 439                                   | 40   | 8   |
| H1        | HI SARS-CoV-2 | 533                                   | 7    | 2   |
| 1016      | SARS-CoV-2    | 3387                                  | 511  | 56  |
| 1016      | HI SARS-CoV-2 | 4329                                  | 3    | 0   |

**Table S2:** Cell counts for clusters identified in HLOs exposed to live SARS-CoV-2

| <b>Cluster</b>                  | <b>Cell Line</b> | <b>Positive for SARS-CoV-2 reads</b> | <b>Negative for SARS-CoV-2 reads</b> |
|---------------------------------|------------------|--------------------------------------|--------------------------------------|
| <b>Hepatocyte-like cells 1</b>  | 1016             | 209                                  | 2538                                 |
|                                 | H1               | 30                                   | 213                                  |
| <b>Hepatocyte-like cells 2</b>  | 1016             | 198                                  | 583                                  |
|                                 | H1               | 12                                   | 188                                  |
| <b>Cholangiocyte-like cells</b> | 1016             | 160                                  | 1208                                 |
|                                 | H1               | 6                                    | 132                                  |

**Table S3:** Sequences for primers used in this study

| Gene       | Forward                 | Reverse                 |
|------------|-------------------------|-------------------------|
| RPLP0      | gcagcatctacaaccctgaag   | gcagacagacactggcaaca    |
| SARS-CoV-2 | gcctcttctcgttctcatcac   | agcagcatcaccgccattg     |
| Albumin    | accccacacgccttggcaciaa  | cacaccctggaataagccgagct |
| HNF4a      | catggccaagattgacaacct   | ttcccatatgttctgcatcag   |
| IL-6       | actcacctcttcagaacgaattg | ccatcttgggaagggtcagggtg |
| MCP-1      | cagcagcaagtgccccaaag    | gagtgagtggtcaagtcttcgg  |

**Figure S1: SARS-CoV-2 infectious virus production in HLO cells, Related to Figure 1.**

**(A)** HLOs generated from H1 iPSCs were dissociated and cultured in 12-well plates. Cells were infected with SARS-CoV-2 at a multiplicity of infection of 1. After a 1-hour adsorption inoculum was removed and fresh media added to HLO cells, and this was considered 0 hours post infection. Media was collected and replaced with fresh media at the indicated time post infection. **(B)** Representative confocal images of HLOs infected with SARS-CoV-2 and stained for dsRNA and KRT17; scale bars, 100  $\mu\text{m}$ .

**Figure S2: Expression pattern of liver specific genes in HLOs, Related to Figure 2**  
UMAP visualization of the integrated scRNA-seq data from HLOs infected with SARS-CoV-2 or treated with heat inactivated virus. Each panel shows the normalized expression from the RNA assay for the gene labeled above the panel. SERPINA1= serpin family A member 1, ALB=albumin, ASGR1= asialoglycoprotein receptor 1, CYP3A4= cytochrome P450 family 3 subfamily A member 4, TF=transferrin, TTR= transthyretin

**Figure S3: Integration of hPSC HLO scRNA-seq data with single nuclei transcriptomic data from SARS-CoV-2 infected patients, Related to Figure 2**

UMAP visualization of the hPSC derived HLO scRNA-sequencing samples integrated with the sn-RNA-seq liver autopsy samples (A), or only the Hepatocytes and Cholangiocytes from the liver autopsy samples(B). Panel (C) shows expression of BST2,

IFI35, IFI6, and ISG15 in UMAP visualization of HLO data integrated with patient hepatocytes and Cholangiocytes (B).

**Figure S4: Transcriptomic Response of HLOs to SARS-CoV-2 Infection, Related to Figure 2**

HLOs generated from 1016 iPSCs were infected with SARS-CoV-2 and sequenced with 10x single-cell sequencing. **(A)** Heatmap of significantly differentially expressed genes (Adj. p-value  $\leq 0.05$ ) in infected HLO cells compared to cells in HLOs exposed to heat-inactivated SARS-CoV-2. **(B)** Dot-plot showing expression of top differentially expressed genes in each major cluster in infected HLO cells versus cells in HLOs exposed to HI SARS-CoV-2. **(C)** Expression pattern of top differentially expressed genes in relation to the number of SARS-CoV-2 genomes detected in the cell. The selection of the genes shown is detailed in Figure 2.

**Figure S5: Transcriptomic Response of bystander cells to SARS-CoV-2 infection, Related to Figure 2.** HLOs generated from H1 ESCs (ESC #1) or 1016 iPSCs (iPSC #1) were infected with SARS-CoV-2 and sequenced with 10x single-cell sequencing. Heatmaps show significantly differentially expressed genes (Adj. p-value  $\leq 0.05$ ) in cells within HLOs exposed to live Sars-CoV-2 that had one or zero reads mapping to the SARS-CoV-2 genome compared to cells in HLOs exposed to HI SARS-CoV-2.

**Figure S6: Exposure to inactive viral particles is sufficient for induction of inflammatory signaling, while viral replication prolongs and amplifies response,**

**Related to Figure 2**

HLOs generated from 1016 iPSCs were infected with either live SARS-CoV-2, heat-inactivated SARS-CoV-2, or conditioned media (mock infected). Total RNA was isolated at either 48 hours post infection or 120 hours post infection and sequenced. (A) Heatmaps showing expression of genes identified as differentially expressed during infection in single cell sequencing (Figure 2) (B) Heatmap of the top 60 significantly upregulated genes (ranked by the DESeq2 statistic) between HLOs exposed to live SARS-CoV-2 and mock infected HLOs. (C) Heatmap of the top 60 significantly upregulated genes (ranked by the DESeq2 statistic) between HLOs exposed to heat-inactivated SARS-CoV-2 and mock infected HLOs.

**Figure S7: Macrophage exposure promotes an inflammatory state during SARS-CoV-2 infection of hPSC derived HLOs, Related to Figure 4**

HLOs generated from 1016 iPSCs were infected with SARS-CoV-2. At 48 hours post infection HLOs were transferred to a transwell system with or without HMacS (Figure 4A). Total RNA was isolated from HLOs at 120 hours post infection and sequenced. Heatmaps show the expression of the core enrichment genes from the GSEA gene sets enriched in infected HLO cultured with HMacS versus infected HLOs not cultured with HMacS (Figure 4B).



**Figure S8: Blocking IL-6 signaling dampens the inflammatory response generated by co-culture with HMacS, Related to Figure 4**

Gene set enrichment analysis (GSEA) comparing infected HLOs cultured with HMacS and tocilizumab to infected HLOs cultured with HMacS and DMSO. The top upregulated and downregulated gene sets are shown.

**Figure S9: hPSC derived macrophages do not support sustained infection by SARS-CoV-2, Related to Figure 4**

**(A)** RT-qPCR of SARS-CoV-2 nucleocapsid (NC) expression in HMacS 96 hours after the initiation of co-culture. **(B)** HMacS were infected with SARS-CoV-2 at a multiplicity of infection of 1. After a 1-hour absorption inoculum was removed and fresh media added, this was considered 0 hours post infection. Media was collected and replaced with fresh media at the indicated time post infection and infectious virus quantitated by plaque assay. **(C)** RT-qPCR of HLO IL-6 expression 96 hours after the initiation of HMac co-culture. Dotted line represents average IL-6 expression in HLOs not exposed to macrophages or tocilizumab (Figure 3A) For (A) and (C) Values are expressed as mean  $\pm$  s.e.m. For (B) Values are expressed as mean  $\pm$  s.d. (\*\*=  $p < 0.01$ ).

**Table S1:** Cell counts of populations identified based on reads mapped to the SARS-CoV-2 genome, Related to Figure 2B

**Table S2:** Cell counts for clusters identified in HLOs exposed to live SARS-CoV-2, Related to Figure 2B and 2E

**Table S3:** Sequences for primers used in this study, Related to Figure 1, Figure 3, Figure 4, and Figure S9
